# Supplementary material for: Direct surface modification of poly(VDF-co-TrFE) films by surface-initiated ATRP without pretreatment
Source: Royal Society of Chemistry journal article supplement (doi:10.1039/c6ra18397b), 2016-01-01
Supplement: c6ra18397b1.pdf [file c6ra18397b1.pdf]

## Supporting Information

### Direct Surface Modification of Poly(VDF-*co*-TrFE) Films by Surface-initiated ATRP without Pretreatment

Motoyasu Kobayashi, Yuji Higaki, Taichi Kimura, Frédéric Boschet, Atsushi Takahara,\* and Bruno Ameduri

#### 1. XPS depth profiling of poly(VDF-*co*-TrFE)-*g*-poly(*t*BA) film using C<sub>60</sub> sputtering.

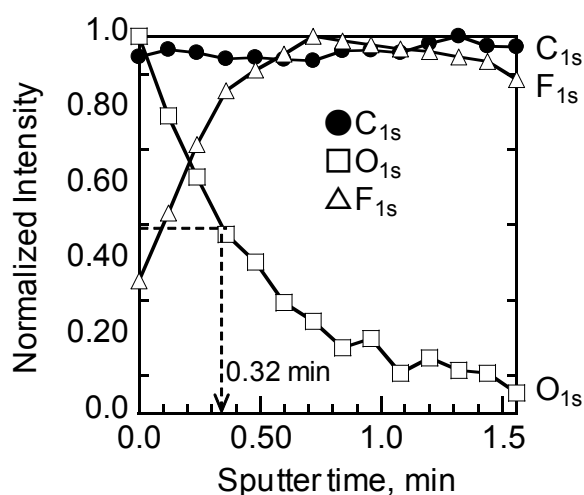

Figure S1. Sputter depth profiling of C<sub>1s</sub>, O<sub>1s</sub> and F<sub>1s</sub> of poly(VDF-*co*-TrFE)-*g*-poly(*t*BA) by C<sub>60</sub><sup>+</sup> sputtering. Atomic concentration of C, O, and F were normalized. The sputter rate was 83.3 nm/min.

XPS spectra were recorded on a PHI Quantera SXM (ULVAC-PHI, Chigasaki, Japan) system using a micro-focused (100 μm, 24.8 W, 15kV) Al X-ray beam (1486.6 eV) with a photoelectron take-off angle of 45°. A dual-beam charge neutralizer (10 V - 7 μA for Ar<sup>+</sup>, and 1.0 V - 20 μA for electron beam) was used to compensate the charge-up effect. The C<sub>60</sub><sup>+</sup> ion source was operated at acceleration voltage of 10 kV with raster area of 2 mm × 2 mm. Analysis size on the sample was φ 0.1 mm. The base pressure of the main chamber (7.0 × 10<sup>-7</sup> Pa) was achieved by evacuation using turbomolecular and ion-getter pumps. The reference specimen for sputter rate measurement was poly(*t*BA) spin-coated film on Si wafer, of which thickness was determined by ellipsometer. The sputter rate by C<sub>60</sub><sup>+</sup> ion was determined to be

83.3 nm/min.

As shown in Figure S1, atomic concentration of oxygen gradually decreased and that of fluorine increased with sputtering time. The depth profiles of  $O_{1s}$  and  $F_{1s}$  indicated that the interface of poly(tBA) and poly(VDF-co-TrFE) was not sharp. Although the outermost surface was almost covered by poly(tBA), there was a mixture region of poly(tBA) and poly(VDF-co-TrFE) inside the film. If we determine the interface between poly(tBA) and poly(VDF-co-TrFE) to be the position when the normalized intensity of  $O_{1s}$  was 0.50, it took 0.32 min to achieve the interface by exposure to  $C_{60}^+$  beam. The thickness of surface-grafted poly(tBA) layer was estimated by sputter time and sputter rate to be  $0.32 \text{ (min)} \times 83.3 \text{ (nm/min)} = 26.6 \text{ (nm)}$ .

## 2. XPS spectra of $C_{1s}$ region of poly(VDF-co-TrFE) and poly(VDF-co-TrFE)-g-poly(tBA) films

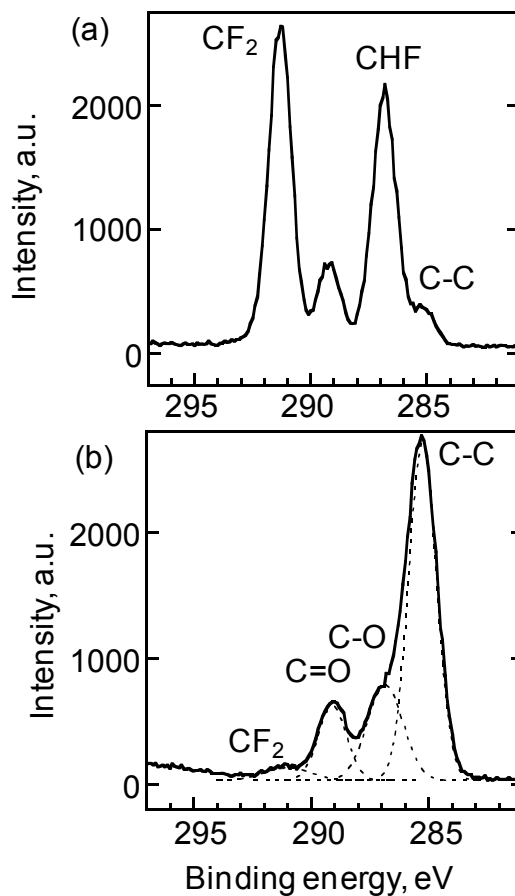

Figure S2. Narrow scan XPS spectra of  $C_{1s}$  region of (a) poly(VDF-co-TrFE) and (b) poly(VDF-co-TrFE)-g-poly(tBA) films

XPS measurement was carried out using an XPS-APEX (Physical Electronics Inc.) at  $1 \times 10^{-9}$  Pa using a monochromatic Al  $K_{\alpha}$  X-ray source operated at 200 W. XPS spectra were collected at takeoff angle of  $45^{\circ}$ . High-resolution spectra of the  $C_{1s}$  were acquired at an energy step of 0.1 eV. Peak area ratio of C-F, C=O, C-O, and C-C bonds in Figure S2(b) was estimated by four Gaussian fitting curves, as represented in Table S1.

Table S1. Area ratio of C-F, C=O, C-O, and C-C bonds of Figure S2(b)

|                                     | C-F   | C=O    | C-O   | C-C   |
|-------------------------------------|-------|--------|-------|-------|
| Binding energy, eV                  | 291.0 | 289.09 | 286.8 | 285.3 |
| Area ratio (obs.), %                | 3.2   | 12.4   | 23.9  | 60.5  |
| Area ratio (theo.) <sup>a</sup> , % | 0.0   | 11.1   | 22.2  | 66.7  |

<sup>a</sup> Theoretical ratio of poly(*t*BA).
